# Supplementary material for: ATM inhibition enhances cancer immunotherapy by promoting mtDNA leakage and cGAS/STING activation
Source: JCI journal article supplement (doi:10.1172/jci139333), 2020-12-08
Supplement: sd1 [file 1]

**Supplementary Table S1. ATM alterations in the 1,661-patient MSK-TMB study**

| <b>Cancer Type</b>         | <b>Total</b> | <b>Mutation</b> | <b>Fusion</b> |
|----------------------------|--------------|-----------------|---------------|
| Bladder Cancer             | 215          | 23              | 0             |
| Colorectal Cancer          | 110          | 11              | 0             |
| Melanoma                   | 320          | 26              | 0             |
| Cancer of Unknown Primary  | 88           | 7               | 0             |
| Non-Small Cell Lung Cancer | 350          | 23              | 0             |
| Esophagogastric Carcinoma  | 126          | 6               | 1             |
| Breast Cancer              | 44           | 2               | 0             |
| Glioma                     | 117          | 3               | 0             |
| Renal Cell Carcinoma       | 151          | 2               | 0             |
| Head and Neck Cancer       | 139          | 1               | 0             |

**Supplementary Table S2. ATM alternations in the 10,945-patient MSK-IMPACT study**

| Cancer Type                 | Total | Mutation | Deep deletion | Amplification | Multi-alterations | Fusion |
|-----------------------------|-------|----------|---------------|---------------|-------------------|--------|
| Small Bowel Cancer          | 35    | 7        | 0             | 0             | 0                 | 0      |
| Skin Cancer, Non-Melaoma    | 148   | 19       | 1             | 0             | 0                 | 0      |
| Bladder Cancer              | 423   | 45       | 2             | 0             | 0                 | 0      |
| Endometrial Cancer          | 218   | 24       | 0             | 0             | 0                 | 0      |
| Hepatobiliary Cancer        | 355   | 27       | 0             | 0             | 0                 | 0      |
| Colorectal Cancer           | 1007  | 75       | 0             | 0             | 0                 | 1      |
| Mature B-Cell Neoplasms     | 134   | 8        | 0             | 0             | 2                 | 0      |
| Non-Small Cell Lung Cancer  | 1668  | 120      | 0             | 2             | 1                 | 0      |
| Melanoma                    | 365   | 23       | 0             | 0             | 0                 | 0      |
| Appendiceal Cancer          | 79    | 4        | 0             | 0             | 0                 | 0      |
| Small Cell Lung Cancer      | 82    | 4        | 0             | 0             | 0                 | 0      |
| Prostate Cancer             | 717   | 25       | 7             | 1             | 0                 | 0      |
| Histiocytosis               | 22    | 1        | 0             | 0             | 0                 | 0      |
| Salivary Gland Cancer       | 114   | 5        | 0             | 0             | 0                 | 0      |
| Thyroid Cancer              | 231   | 10       | 0             | 0             | 0                 | 0      |
| Cancer of Unknown Primary   | 186   | 8        | 0             | 0             | 0                 | 0      |
| Breast Cancer               | 1324  | 48       | 3             | 2             | 0                 | 0      |
| Adrenocortical Carcinoma    | 25    | 1        | 0             | 0             | 0                 | 0      |
| Mature T and NK Neoplasms   | 29    | 1        | 0             | 0             | 0                 | 0      |
| Renal Cell Carcinoma        | 361   | 12       | 0             | 0             | 0                 | 0      |
| Head and Neck Cancer        | 186   | 14       | 0             | 0             | 0                 | 1      |
| Pancreatic Cancer           | 502   | 69       | 7             | 2             | 0                 | 0      |
| Glioma                      | 553   | 14       | 1             | 0             | 0                 | 0      |
| Soft Tissue Sarcoma         | 443   | 13       | 1             | 0             | 0                 | 0      |
| Esophagogastric Cancer      | 341   | 8        | 1             | 0             | 0                 | 0      |
| Peripheral Nervous System   | 80    | 0        | 2             | 0             | 0                 | 0      |
| Germ Cell Tumor             | 288   | 2        | 0             | 1             | 0                 | 1      |
| Ovarian Can                 | 244   | 2        | 1             | 0             | 0                 | 0      |
| Uterine Sarcoma             | 93    | 1        | 0             | 0             | 0                 | 0      |
| Mesothelioma                | 107   | 1        | 0             | 0             | 0                 | 0      |
| Bone Cancer                 | 134   | 1        | 0             | 0             | 0                 | 0      |
| Gastrointestinal Stromal Ca | 137   | 0        | 0             | 0             | 0                 | 1      |

**Supplementary Table S3. SgRNA used in CRISPR/Cas9-mediated gene knockouts**

| <b>Target</b>  | <b>Sequence</b>      |
|----------------|----------------------|
| Human-ATM-sg1  | TTGTTTCAGGATCTCGAATC |
| Human-ATM-sg2  | GATGCAGGAAATCAGTAGTT |
| Mouse-ATM-sg1  | CTCTGTCATGCTCTAACTGC |
| Mouse-ATM-sg2  | CTGTTTCAGGATCCTGAATC |
| Mouse-TFAM-sg1 | ACGGGGGTCGAGATGTGCGC |
| Mouse-TFAM-sg2 | TACCAGCGTGGGAACTCCGG |
| Mouse-cGAS     | CAGAATGCAGAAACGGGAGT |
| Mouse-TBK      | TGCCGTTTAGACCCTTCGAG |
| Mouse-Sting    | CTTCTCGCTACAACACATGA |
| Mouse-MDA5     | GGCAGGGATTCAGGCACCAT |

**Supplementary Table S4. Oligonucleotide primers for qPCR**

| <b>Target</b>             | <b>Sequence</b>           |
|---------------------------|---------------------------|
| Mouse- $\beta$ -actin (F) | GAAATCGTGCGTGACATCAAA     |
| Mouse- $\beta$ -actin (R) | TGTAGTTTCATGGATGCCACA     |
| Mouse-IFN $\beta$ 1 (F)   | CTGGCTTCCATCATGAACAA      |
| Mouse-IFN $\beta$ 1 (R)   | AGAGGGCTGTGGTGGAGAA       |
| Mouse-IFN $\alpha$ (F)    | GGATGTGACCTTCCTCAGACTC    |
| Mouse-IFN $\alpha$ (R)    | ACCTTCTCCTGCGGGAATCCAA    |
| Mouse-CCL5 (F)            | CAAGTGCTCCAATCTTGCAGTC    |
| Mouse-CCL5 (R)            | TTCTCTGGGTTGGCACACAC      |
| Mouse-IFIT1 (F)           | CAAGGCAGGTTTCTGAGGAG      |
| Mouse-IFIT1 (R)           | GACCTGGTCACCATCAGCAT      |
| Mouse-ISG15 (F)           | CTAGAGCTAGAGCCTGCAG       |
| Mouse-ISG15 (R)           | AGTTAGTCACGGACACCAG       |
| Mouse-mtDNA Dloop1 (F)    | AATCTACCATCCTCCGTGAAACC   |
| Mouse-mtDNA Dloop1 (R)    | TCAGTTTAGCTACCCCCAAGTTTAA |
| Mouse-mtDNA Dloop2 (F)    | CCCTTCCCCATTGGTCT         |
| Mouse-mtDNA Dloop2 (R)    | TGGTTTCACGGAGGATGG        |
| Mouse-mtDNA Dloop3 (F)    | TCCTCCGTGAAACCAACAA       |
| Mouse-mtDNA Dloop3 (R)    | AGCGAGAAGAGGGGCATT        |
| Mouse-mtDNA CytB (F)      | GCTTTCCACTTCATCTTACCATTTA |
| Mouse-mtDNA CytB (R)      | TGTTGGGTTGTTTGATCCTG      |
| Mouse-mtDNA 16S (F)       | CACTGCCTGCCAGTGA          |
| Mouse-mtDNA 16S (R)       | ATACCGCGGCCGTTAAA         |
| Mouse-mtDNA ND1(F)        | CTAGCAGAAACAAACCGGGC      |
| Mouse-mtDNA ND1 (R)       | CCGGCTGCGTATTCTACGTT      |
| Mouse-mtDNA ND4 (F)       | AACGGATCCACAGCCGTA        |
| Mouse-mtDNA ND4 (R)       | AGTCCTCGGGCCATGATT        |
| Mouse-mtDNA-Cox1 (F)      | GCCCCAGATATAGCATTCCC      |
| Mouse-mtDNA-Cox1 (R)      | GTTCATCCTGTTCTGCTCC       |
| Mouse-nucDNA HK2 (F)      | GCCAGCCTCTCCTGATTTTAGTGT  |

|                         |                           |
|-------------------------|---------------------------|
| Mouse-nucDNA HK2 (R)    | GGGAACACAAAAGACCTCTTCTGG  |
| Mouse-nucDNA Tert (F)   | CTAGCTCATGTGTCAAGACCCTCTT |
| Mouse-nucDNA Tert (R)   | GCCAGCACGTTTCTCTCGTT      |
| Mouse-nucDNA PTGER2 (F) | CCTGCTGCTTATCGTGGCTG      |
| Mouse-nucDNA PTGER2 (R) | GCCAGGAGAATGAGGTGGTC      |
| Mouse-nucDNA NDUFV1 (F) | CTCCCCACTGGCCTCAAG        |
| Mouse-nucDNA NDUFV1 (R) | CCAAAACCCAGTGATCCAGC      |

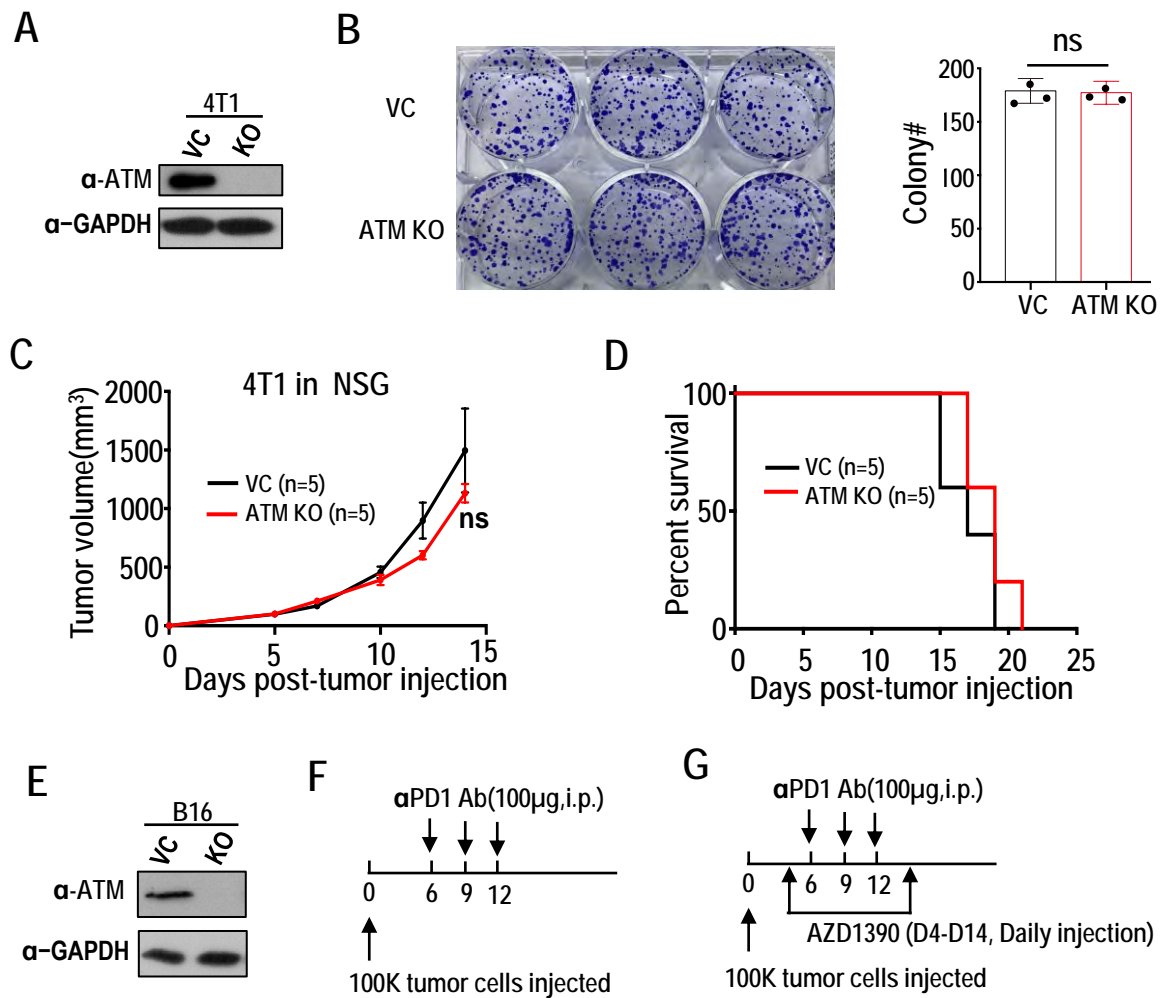

**Supplementary Figure 1. ATM knockout and its effect on tumor growth in vitro and in vivo. (A)** Western blot analysis of ATM expression in control and ATMKO 4T1 tumor cells. **(B)** Clonogenic abilities of vector control and ATM KO 4T1 cells. Cells were seeded in 6-well plates at 500 cells per well in triplicates and allowed to grow for 6 days before staining with crystal violet (left panel). The colony number was counted by use of Image J and plotted (right panel). **(C-D)** Tumor volume (C) and Kaplan-Meier survival curve (D) of immunodeficient NSG mice inoculated with about  $1 \times 10^5$  control or ATMKO 4T1 cells. **(E)** Western Blot analysis of ATM expression of vector control and ATMKO murine B16F10 tumor cells. **(F)** Treatment schedule for tumor growth delay experiments in Fig. 1E, 1F. **(G)** Treatment schedule of tumor growth delay experiments in Fig. 1G, 1H, 1I, 1J. Error bars represent  $\pm$ SEM. NS, not significant, as determined by unpaired Student's t test (B and C) or log-rank test (D).

**A**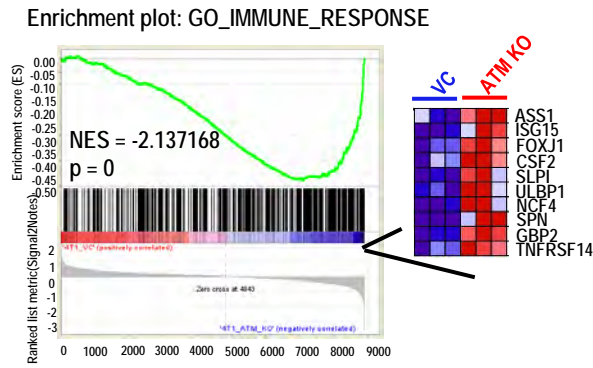**B**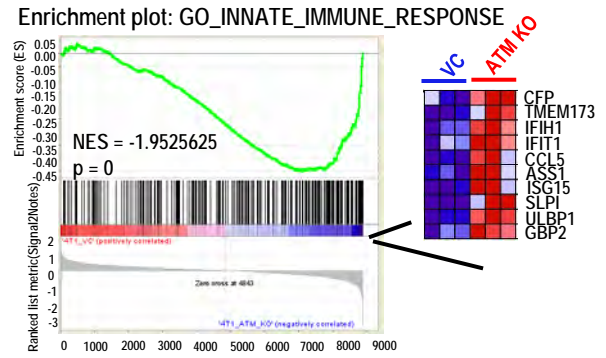**C**

Enrichment plot:  
GO\_POSITIVE\_REGULATION\_OF\_CYTOKINE\_SECRETION

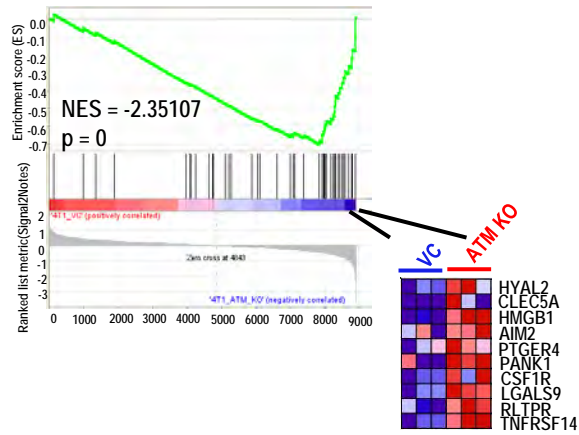

Supplementary Figure 2. Upregulation of expression of genes involved in innate immune response and cytokine secretion in ATM-deficient 4T1 cells in vitro. Gene set enrichment analysis (GSEA) of genes involved in immune response (A), innate immune response (B), and cytokine secretion (C) in vector control and ATMKO 4T1 cells. FDR calculated using GSEA.

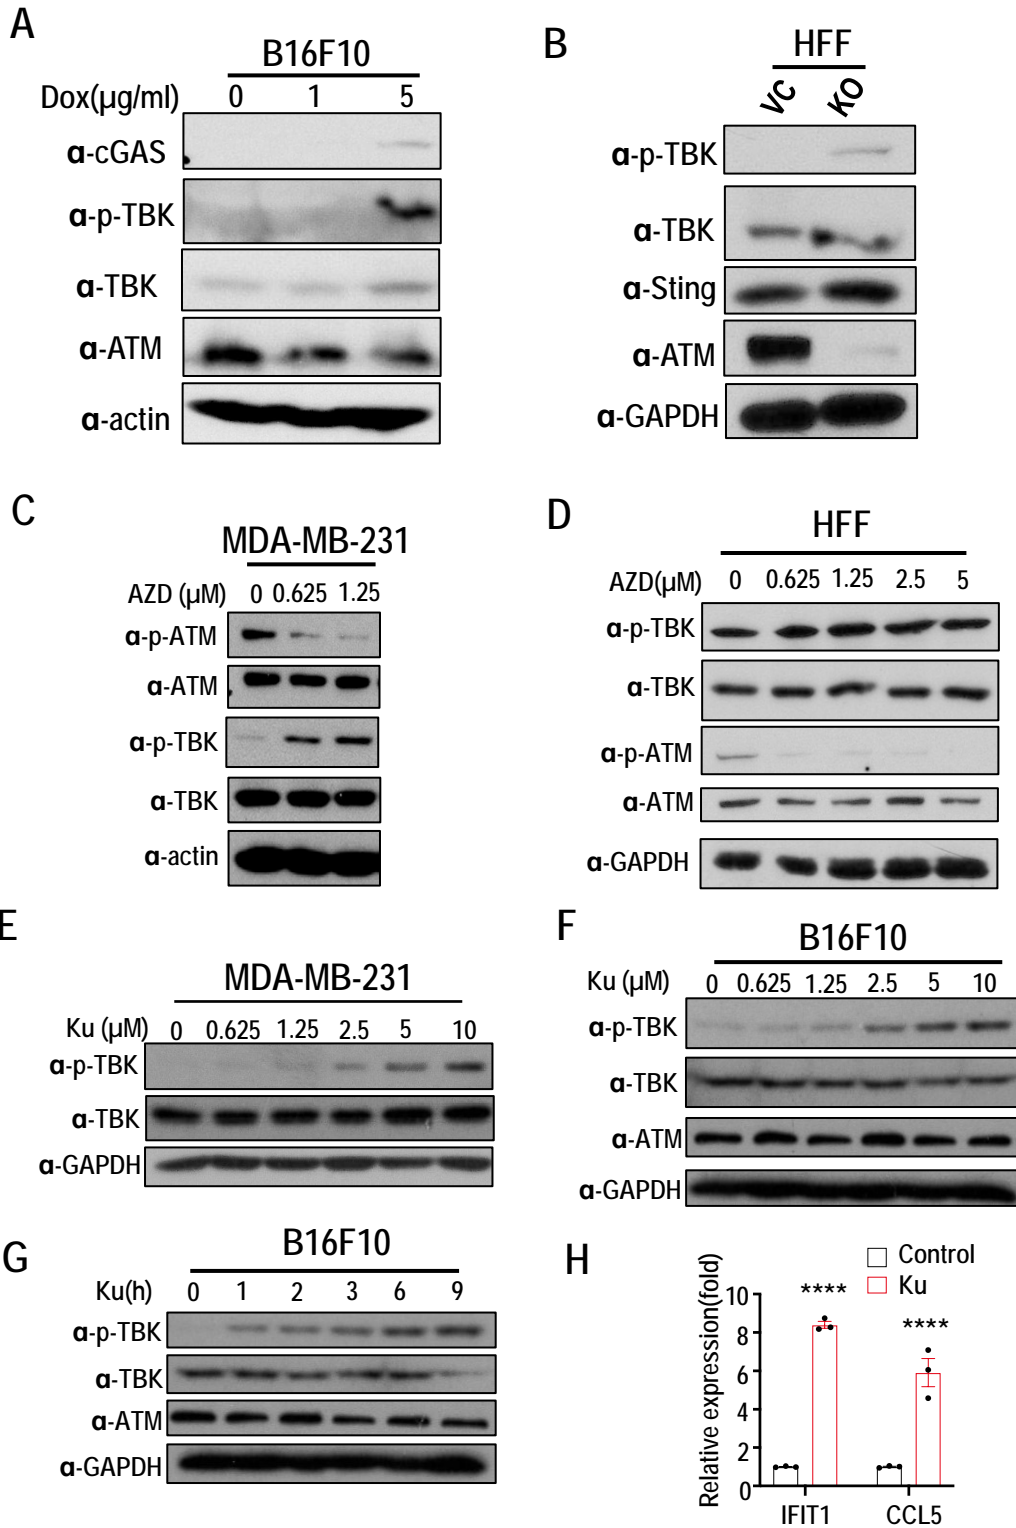

**Supplementary Figure 3. Additional data on ATM inhibition induced cGAS-STING activation in malignant and normal cells.** (A) WB analysis of p-TBK, TBK, cGAS and ATM in B16F10 cells that had been transfected with inducible ATM shRNA and treated with doxycycline at indicated concentrations for 4 days. (B) WB analysis of p-TBK, TBK, STING and ATM in vector control(VC) and ATM KO human foreskin fibroblast (HFF) cells. (C) WB analysis of p-ATM and p-TBK levels in MDA-MB-231 cells treated with AZD1390 at indicated concentrations for 48 hrs. (D) WB analysis of p-ATM and p-TBK levels in HFF cells treated with AZD1390 at indicated concentrations for 48 hrs. (E) WB analysis of p-TBK and TBK in MDA-MB-231 cells treated with Ku55933 at indicated concentrations for 6 hrs. (F) WB analysis of p-TBK and TBK in B16F10 cells treated with 5 μM Ku55933 at indicated times. (G) WB analysis of p-TBK and TBK in B16F10 cells treated with Ku55933 (10 μM) for different times. (H) Transcription levels of IFIT1 and CCL5 in B16F10 cells treated with 10μM Ku55933 for 9 hrs and analyzed by real-time PCR. Error bars represent SEM, n=3, \*\*\*\*p<0.001, as determined by 2-way ANOVA



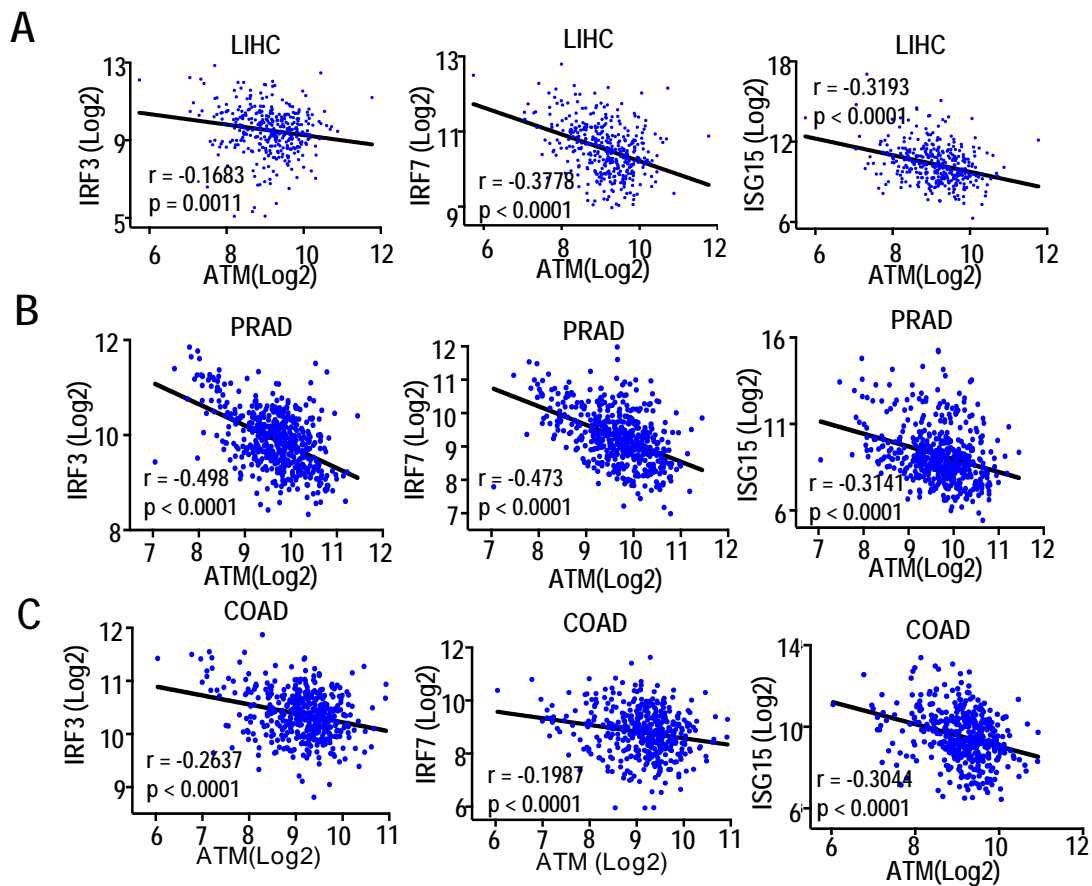

**Supplementary Figure 4. Correlation between ATM and ISG gene transcriptional levels.** Correlation analysis for ATM expression level versus IRF3, IRF7, and ISG15 in human (A) liver hepatocellular carcinoma (LIHC, 366 samples), (B) prostate adenocarcinoma (PRAD, 498 samples), (C) colorectal adenocarcinoma (COAD, 437 samples) from TCGA Pan Cancer Atlas. R and p represent Pearson correlation coefficients and p values from two-tailed Student's t-test.

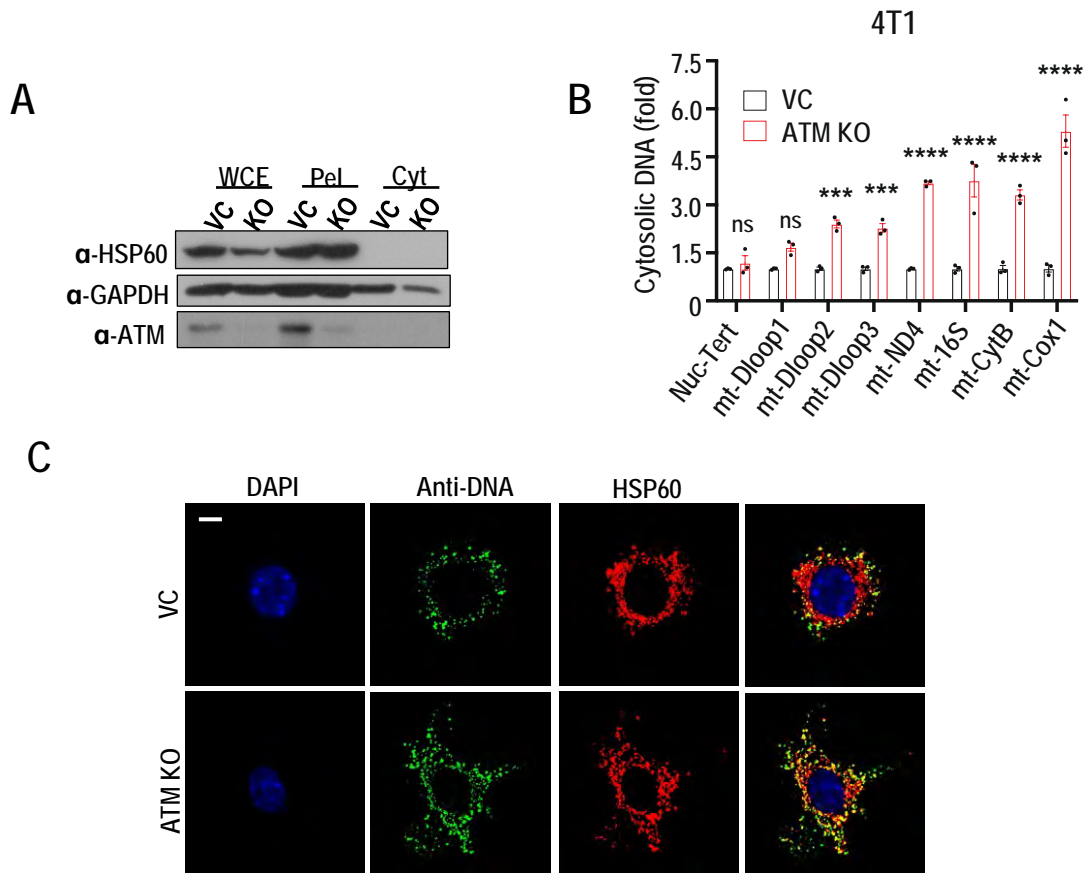

**Supplementary Figure 5. Additional data validating mitochondrial DNA release as the key factor in ATM deficiency-mediated cGAS-STING activation.** (A) WB analysis validating our cellular fractionation protocol. Vector control and ATM KO 4T1 cells were subjected to digitonin fractionation as described in the Methods. extracts (WCE), pellets (Pel) and cytosolic extracts (Cyt) were blotted using indicated antibodies. (B) DNA was extracted from digitonin extracts of vector control and ATM 4T1 cells. Cytosolic mtDNA was quantitated via qPCR using mitochondrial DNA primer sets and the nuclear gene TERT primer. Normalization was carried out as described in the Materials and Methods section. (C) Immunofluorescence detection of dsDNA location in vector control (VC) and ATM KO 4T1 cells by use of anti-dsDNA (green), anti-HSP60 (red, for mitochondria), and DAPI (for nuclear DNA). Scale bar represents 10  $\mu$ m. Error bars in B represent SEM, n=3, \*p<0.05, \*\*p<0.01, \*\*\*p<0.001, \*\*\*\*p<0.0001, ns, not significant, as determined by 2-way ANOVA.

A

Enrichment plot: MITOCHONDRIAL\_MATRIX

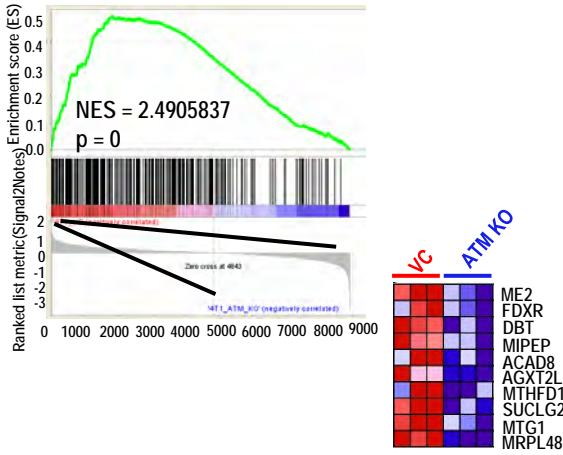

B

Enrichment plot: GO\_MITOCHONDRIAL\_TRANSLATION

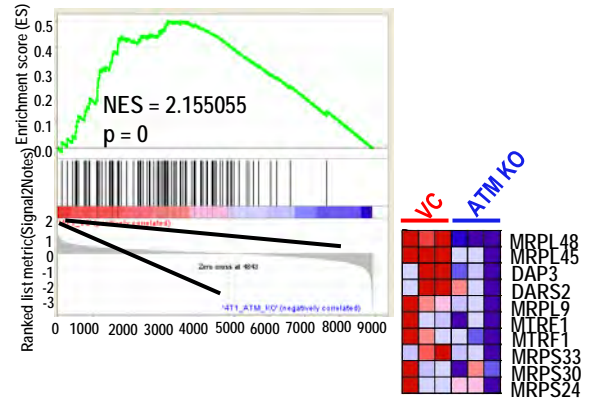

C

Enrichment plot:  
GO\_MITOCHONDRIAL\_PROTEIN\_COMPLEX

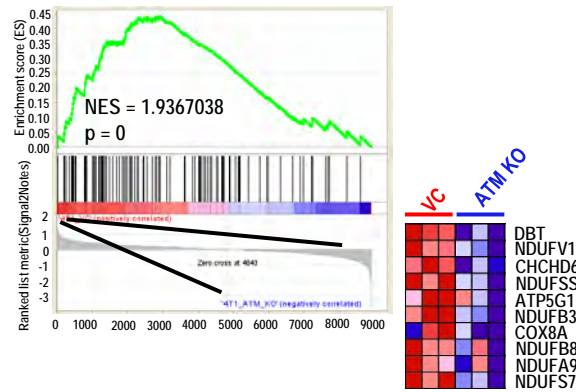

Supplementary Figure 6. Down-regulation of expression of genes involved in mitochondrial functions in ATM-deficient 4T1 cells in vitro. Gene set enrichment analysis (GSEA) of mitochondrial matrix genes (A), mitochondrial translation genes (B), and mitochondrial protein complex genes (C) in control and ATM KO 4T1 tumor cells.

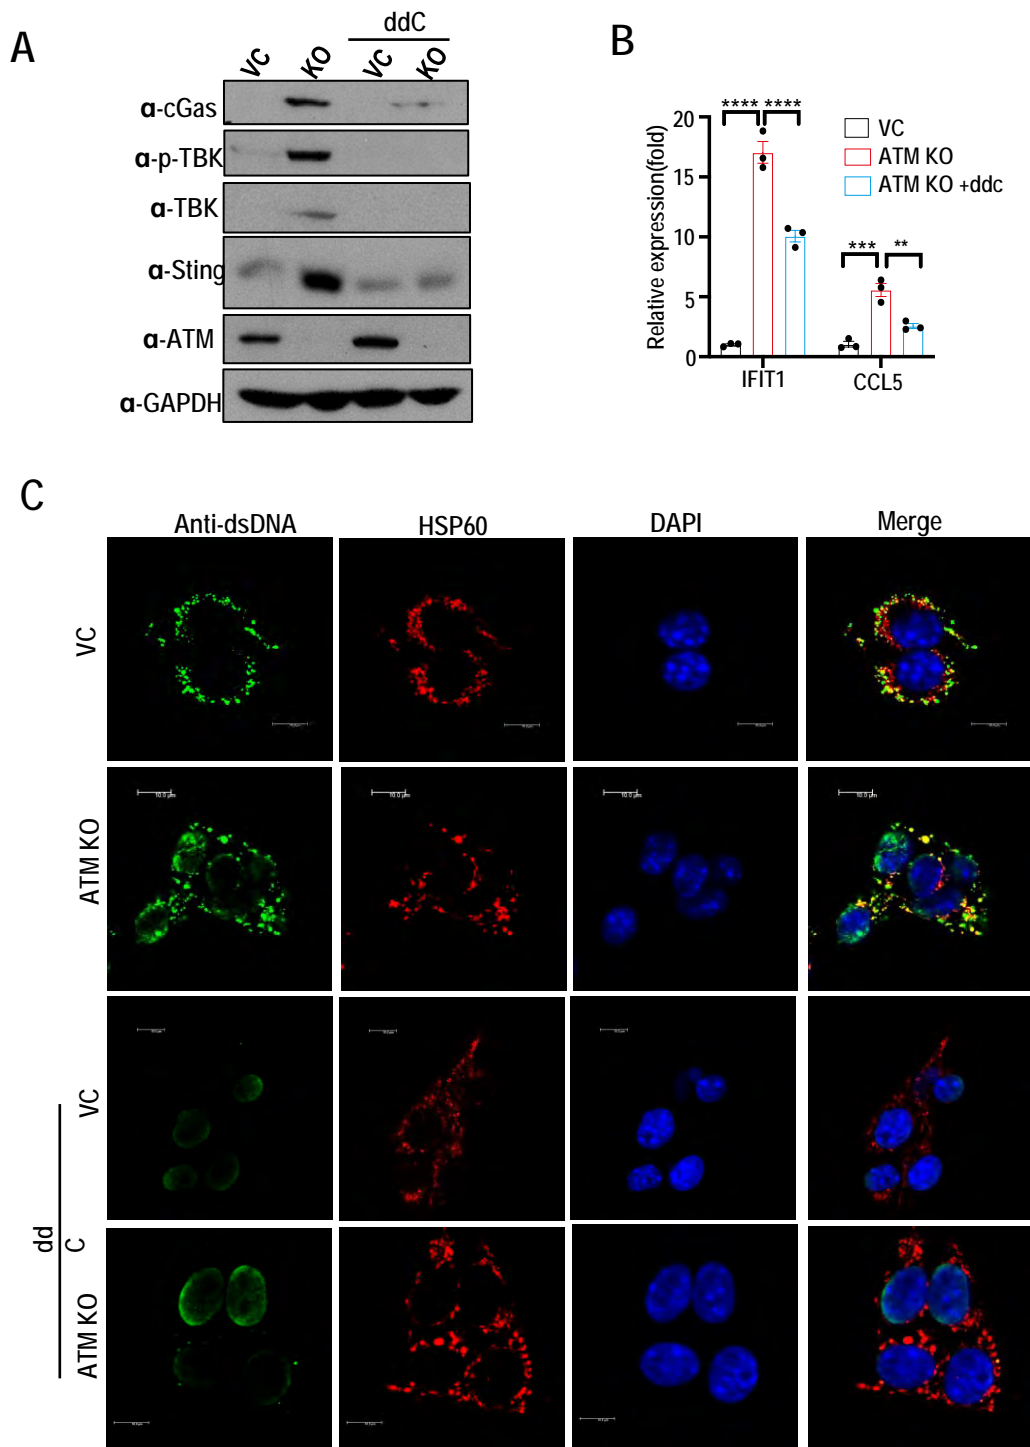

**Supplementary Figure 7. Additional data validating cytoplasmic release of mtDNA being responsible for ATM inhibition induced cGAS-STING activation.** (A) WB analysis of protein levels of pTBK, TBK, cGas and STING in control (VC) and ATM KO B16F10 cells exposed to 100 nM /ml ddC for 20 days to deplete mtDNA. (B) Q-PCR analysis of type I interferon response gene expression in vector control and ATMKO B16F10 cells that had been treated with 100 nM /ml ddC for 20 days to deplete mtDNA. (C) Control (VC) and ATM KO B16F10 cells that had been treated with 100 nM /ml ddC for 20 days were co-stained with anti-dsDNA (green), anti-HSP60(red) and DAPI. Scale bar indicated 10  $\mu$ m. Error bars represent SEM, n=3, \*p<0.05, \*\*p<0.01, \*\*\*p<0.001, \*\*\*\*p<0.0001, ns, not significant, as determined by 2-way ANOVA.

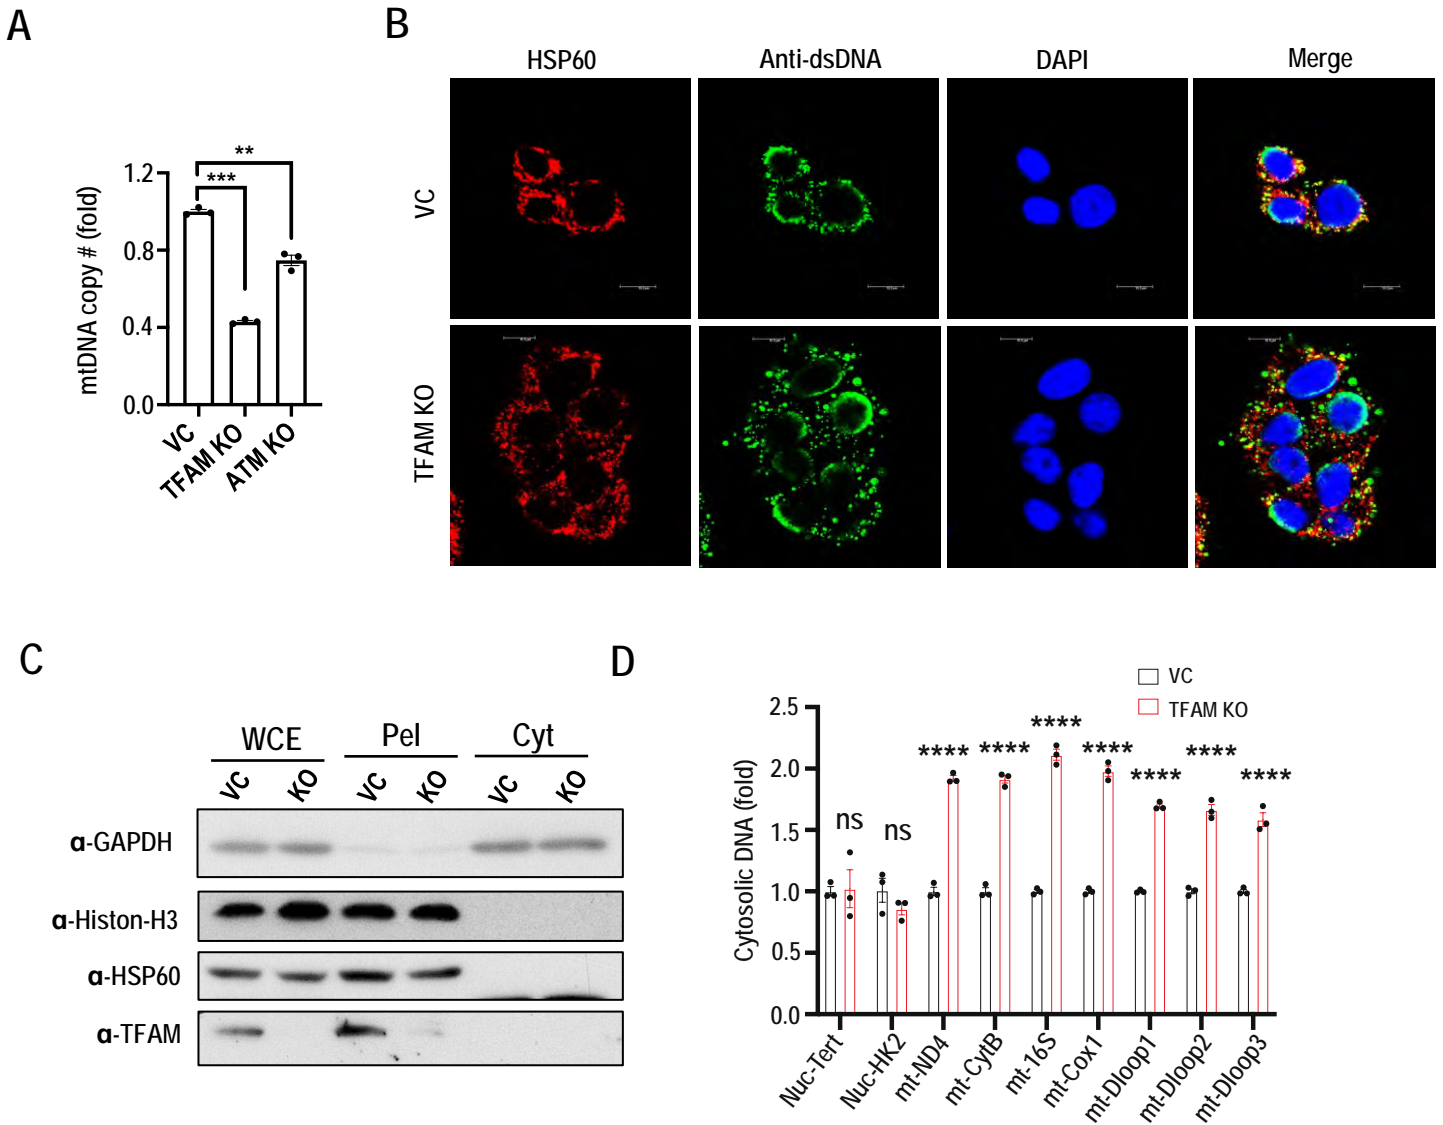

**Supplementary Figure 8. Additional data validating mitochondrial DNA release as being involved in TFAM deficiency-mediated cGAS-STING activation.** (A) qPCR analysis of mitochondrial copy number based on mitochondrial gene ND1 in vector control (VC) and TFAM KO or ATM KO B16F10 cells. (B) Immunofluorescence detection of dsDNA location in vector control (VC) and TFAM KO B16F10 cells by use of anti-dsDNA (green), anti-HSP60 (red, for mitochondria), and DAPI (for nuclear DNA). Scale bar represents 10  $\mu$ m. (C) WB analysis validating our cellular fractionation protocol. Vector control and TFAM KO B16F10 cells were subjected to digitonin fractionation as described in the Material and Methods section. Whole cell extracts (WCE), cell pellets (Pel) and cytosolic extracts (Cyt) were then blotted using indicated antibodies. (D) Cytosolic DNA was extracted from digitonin extracts of vector control and TFAM KO B16F10 cells. Cytosolic mtDNA was quantitated by qPCR using mitochondrial DNA primer sets and while nuclear DNA by use of the TERT gene primers. Normalization was carried out as described in the Materials and Methods section. Error bars in A & D represent SEM. \* $p < 0.05$ , \*\* $p < 0.01$ , \*\*\* $p < 0.001$ , \*\*\*\* $p < 0.0001$  ns, not significant, as determined by 2-way ANOVA.

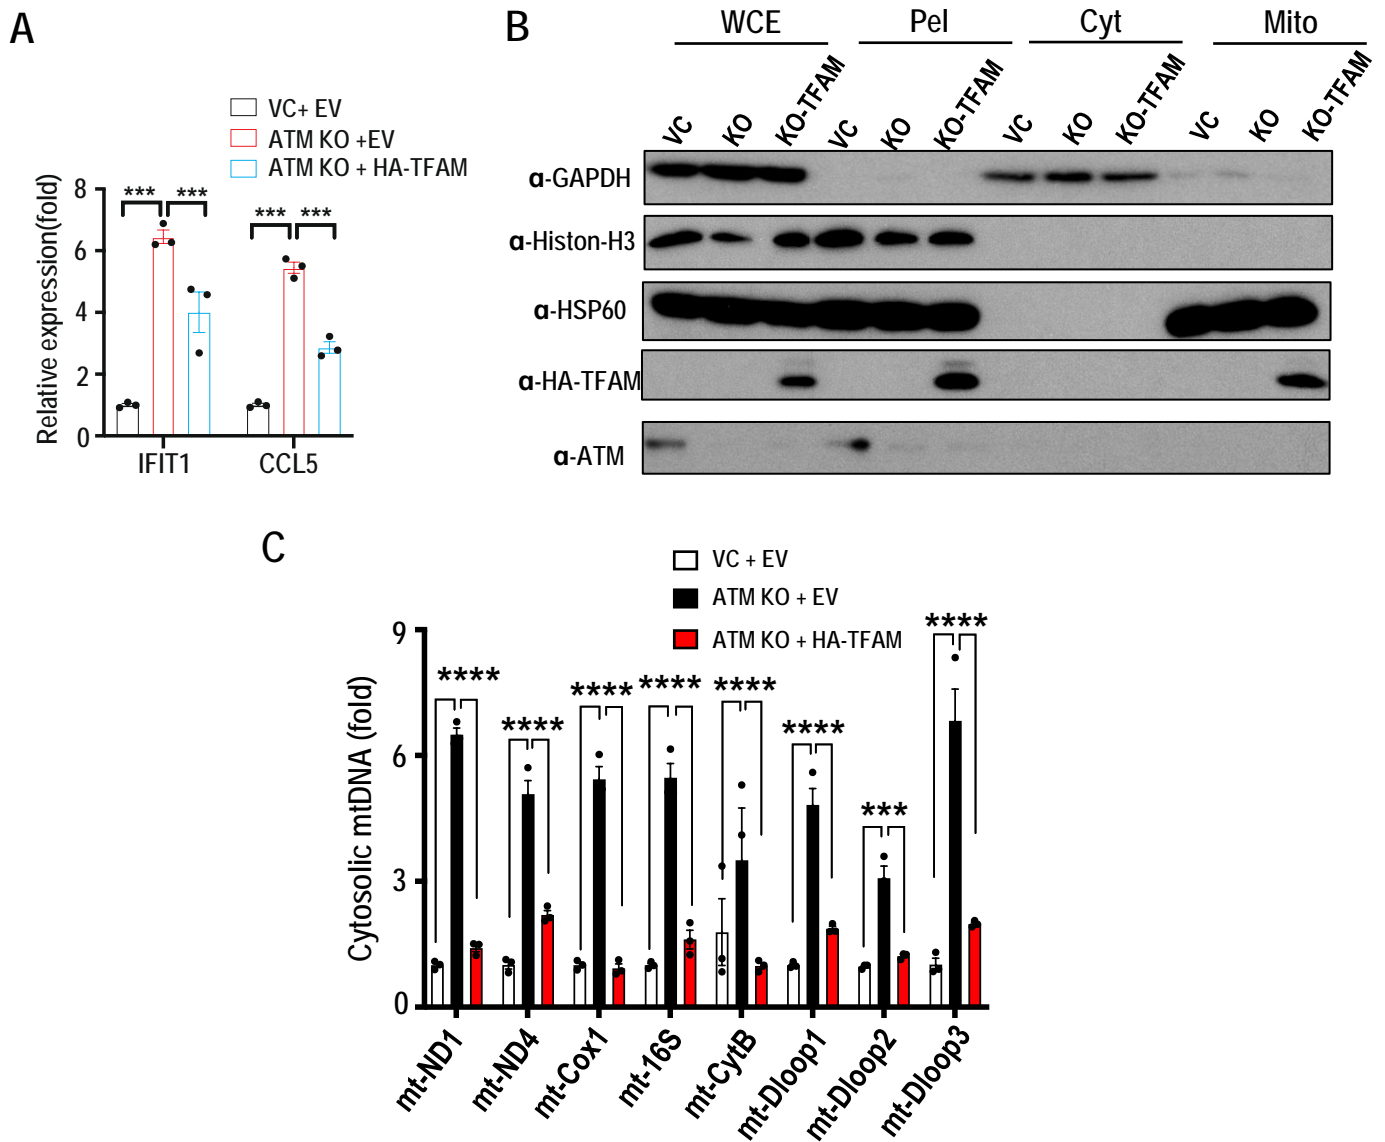

**Supplementary Figure 9. Over-expression of TFAM in ATM KO cells inhibits release of mitochondria DNA and cGAS/STING activation.** (A) Q-PCR analysis of interferon-stimulated gene expression in vector control and ATMKO B16F10 cells that had been transfected with empty vector (EV) or HA-TFAM. (B) WB verification of our cytosol fractionation protocol. Vector control and ATM KO B16 cells had been transfected with empty control (EV) or HA-TFAM were subjected to digitonin fractionation as described in the Methods and whole-cell extracts (WCE), pellets (Pel), cytosolic extracts (Cyt) and mitochondrion (Mito) were blotted using indicated antibodies. (C) Q-RT PCR quantification of cytosolic DNA extracted from digitonin-permeabilized cytosolic extracts of control and ATM KO B16F10 cells that had been transfected with empty vector (EV) or HA-TFAM. Normalization was carried out as described in the Methods section. In A & C, error bars represent  $\pm$ SEM,  $n=3$ , \* $p<0.05$ , \*\* $p<0.01$ , \*\*\* $p<0.001$ , \*\*\*\* $p<0.0001$  ns, not significant, as determined by two-way ANOVA.

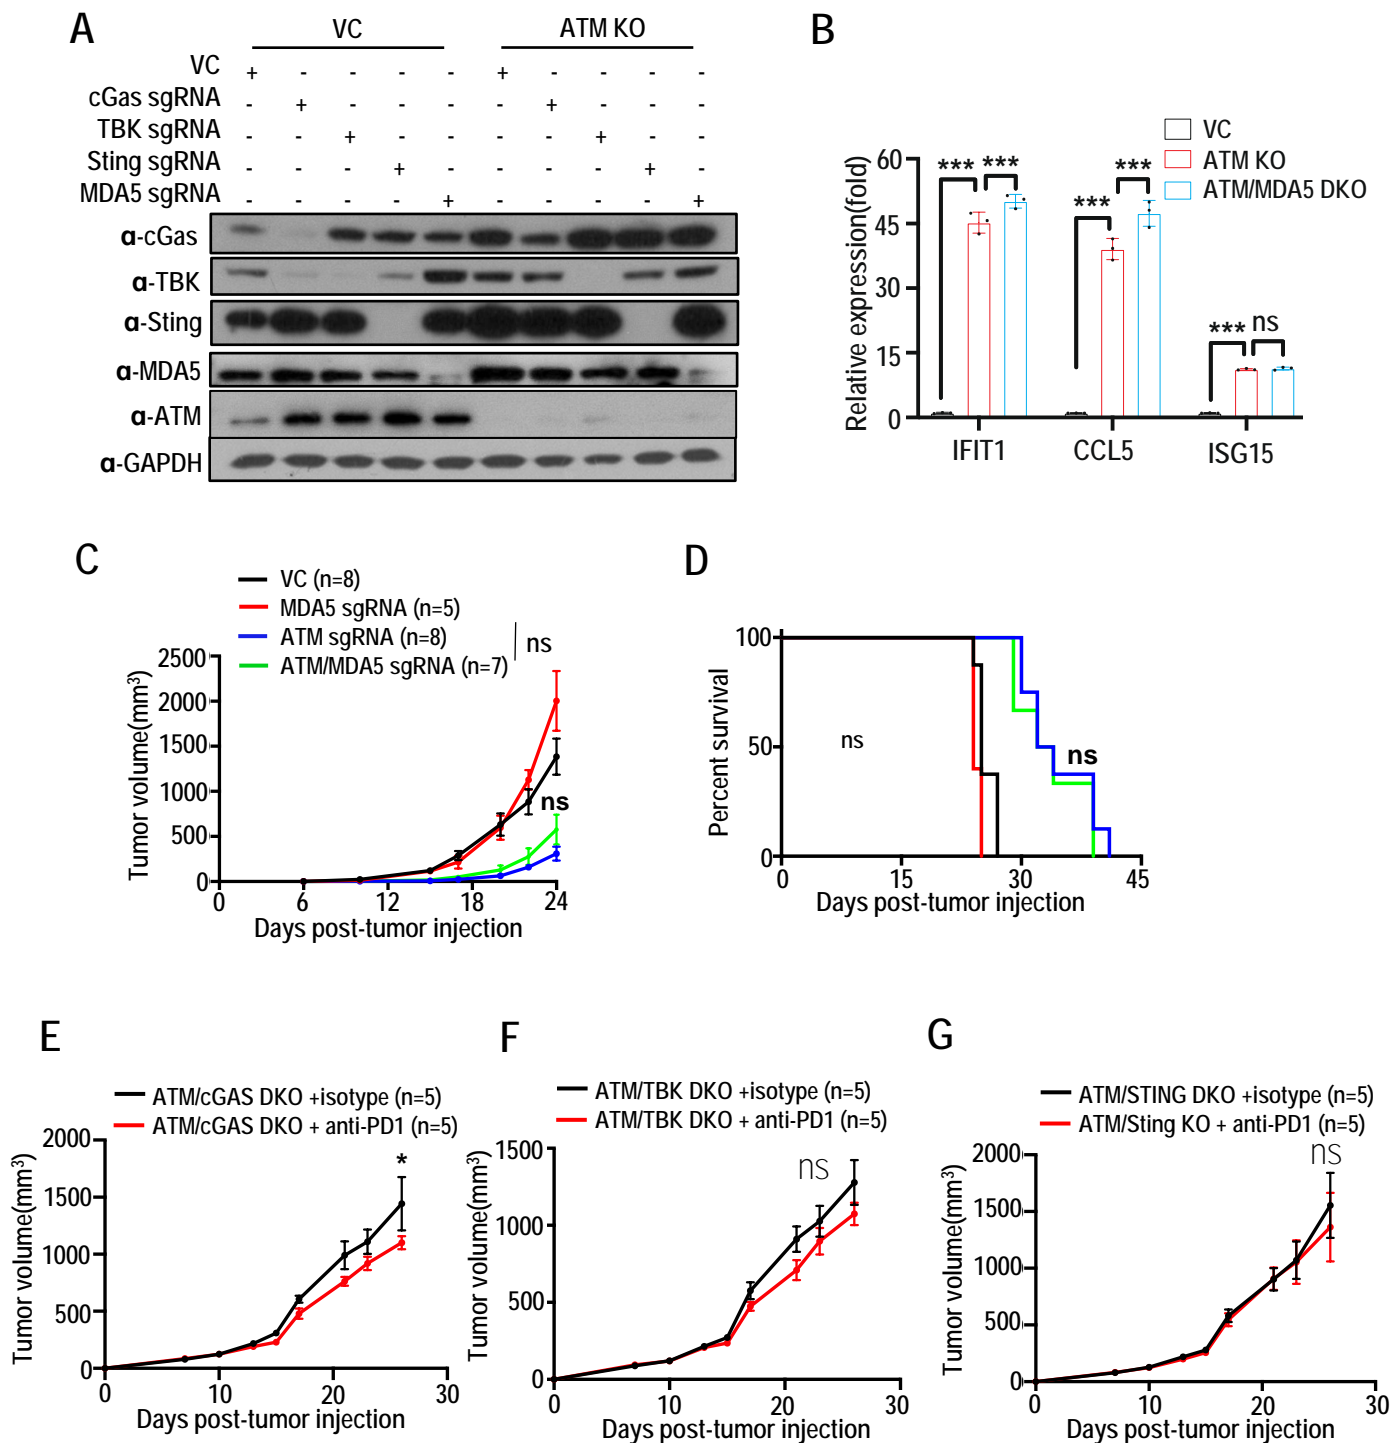

**Supplementary Figure 10. MDA5 is not required for ATM deficiency mediates ISG activation and tumor growth delays.** (A) WB verification of gene knockout for cGas, TBK, STING, and MDA5 in vector control (VC), and ATMKO cells. GAPDH was used as the protein loading control. (B) Transcriptional levels of interferon response genes in vector control (VC), ATM KO or or ATM/MDA5 DKO B16 cells analyzed by real-time qPCR. Error bars: SEM, n=3. \*\*\*p<0.001. (C-D) Tumor volume (C) and Kaplan-Meier survival curve (D) of C57BL/6 mice inoculated with  $1 \times 10^5$  vector control (VC), MDA5 KO, ATM KO, or ATM/MDA5 DKO B16F10 cells. The control groups VC and ATMKO are the same as shown in Fig. 6D-I. (E-G) Tumor growth in C57BL/6 mice inoculated with  $1 \times 10^5$  ATM KO or ATM/cGas DKO (E), ATM/TBK DKO (F), and ATM/STING DKO (G) B16F10 cells and treated with anti-PD1 antibody or isotype control (at 100 $\mu$ g/mouse) on days 6, 9, 12. Error bars represent SEM. \*p<0.05, \*\*p<0.01, \*\*\*p<0.001, ns, not significant, as determined by 2-way ANOVA (C) or log-rank test (D).



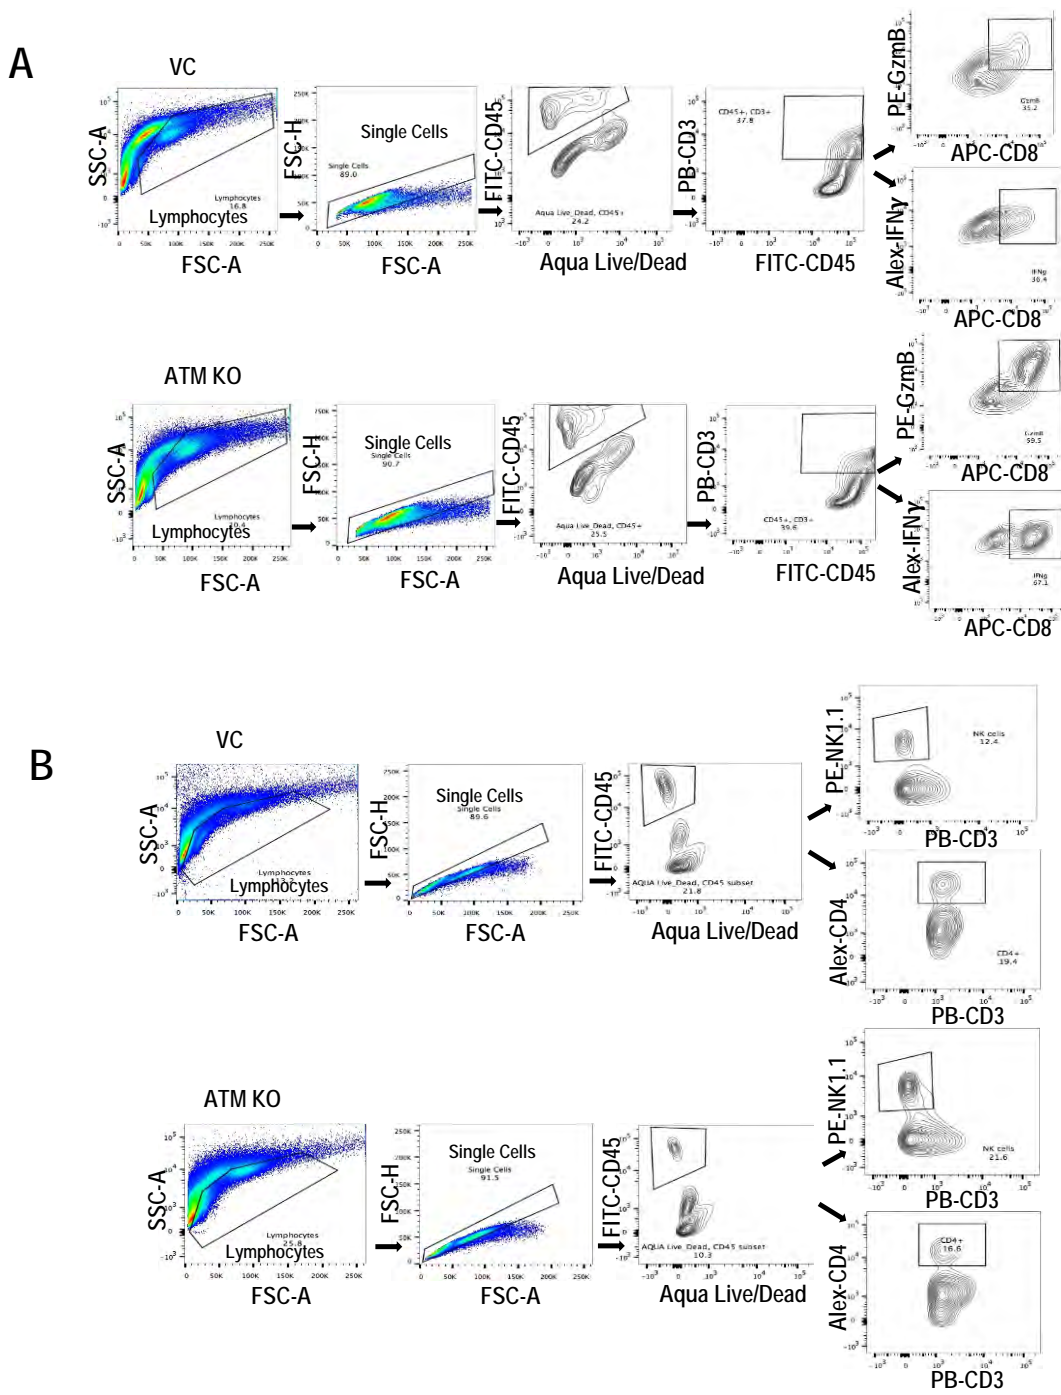

**Supplementary Figure 11. Additional data on lymphocyte infiltration into ATM deficient tumors. (A)** Gating strategy and representative flow cytometry plots for the quantification of CD4<sup>+</sup> T cells , GzmB<sup>+</sup>CD8<sup>+</sup> and IFN $\gamma$ <sup>+</sup>CD8<sup>+</sup> T cells in vector control(VC) and ATM KO B16 tumors. **(B)** Gating strategy and representative flow cytometry graphs for the assessment of CD4<sup>+</sup> T cells and NK cells in vector control(VC) and ATM KO B16 tumors.



**A**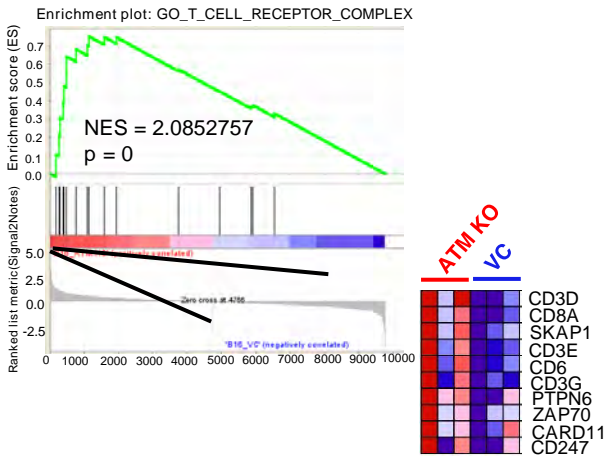**B**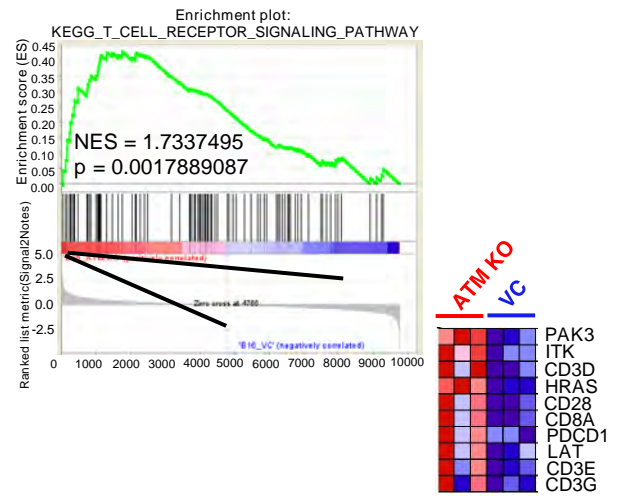

**Supplementary Figure 12. RNAseq profiling of ATM deficient tumors in vivo.** Gene set enrichment analysis (GSEA) of T cell receptor complex (A) and T cell receptor signaling (B) gene expression in control and B16F10 ATMKO tumors. FDR calculated using GSEA.

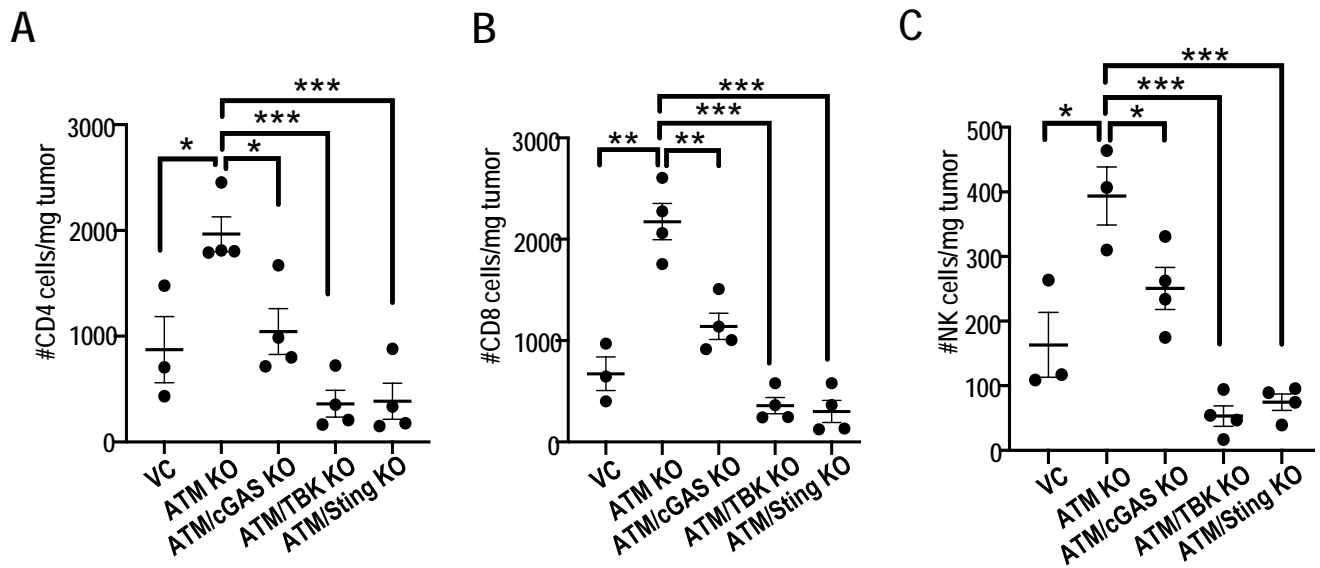

**Supplementary Figure 13. Additional analysis of lymphocyte infiltration into ATM deficient tumors.** Average numbers of tumor-infiltrating CD4<sup>+</sup> T cells (**A**), CD8<sup>+</sup> T cells (**B**), NK1.1<sup>+</sup> NK cells (**C**) in tumors established from vector control (VC), ATM KO B16F10, ATM/cGas DKO, ATM/TBK DKO, ATM/STING DKO B16F10 tumor cells inoculated in C57BL/6 mice. Flow cytometry analysis were done on day 13 post inoculation of  $1 \times 10^5$  tumor cells. Error bars represent standard error of the mean (SEM). \* $p < 0.05$ , \*\* $p < 0.01$ , \*\*\* $p < 0.001$ , \*\*\*\* $p < 0.0001$ , ns, not significant, as determined by 2-way ANOVA

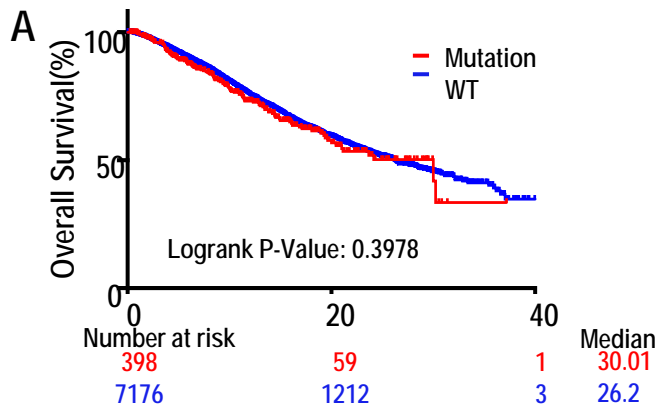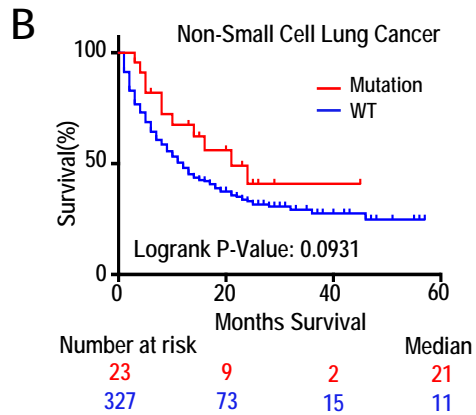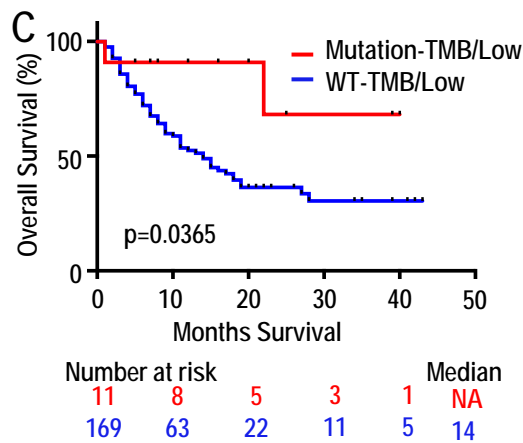

**Supplementary Figure 14. Additional human clinical data regarding the influence of ATM mutations on tumor responses to ICB therapy.** (A) Kaplan-Meier survival curve of patients from the whole MSK-IMPACT cohort with (red) or without (blue) ATM mutations who were not treated with ICB therapy. Data from the MSK-IMPACT clinical sequencing cohort (reference 43). (B) Kaplan-Meier survival data after immune checkpoint inhibitor therapy in non-small cell lung cancer patients with (red) or without (blue) ATM mutations. Data from the MSK-TMB cohort (reference 41). (C) Kaplan-Meier survival of curve of overall survival of patients with bladder cancer treated ICB therapy. Compared with Fig. 9D, only those patients with TMB<20 were considered to exclude the influence of MSI status. P values calculated by use of logrank test
